# Supplementary material for: Comparing direct pyrolysis and post-impregnation in the synthesis of atomic Fe active sites for solvent-free aerobic coupling of benzylamine
Source: Royal Society of Chemistry journal article supplement (doi:10.1039/d4ta04731a), 2024-01-01
Supplement: d4ta04731a1.pdf [file d4ta04731a1.pdf]

## Supporting Information

### Comparing direct pyrolysis and post-impregnation in the synthesis of atomic Fe active sites for solvent-free aerobic coupling of benzylamine

Guilong Lu <sup>1</sup>, Zewen Shen <sup>2</sup>, Philipp Schwiderowski <sup>1</sup>, Jannik Böttger <sup>1</sup>, Tim Herrendorf <sup>3</sup>, Wolfgang Kleist <sup>3</sup>, Xiaoyu Li <sup>1</sup>, Guixia Zhao <sup>2</sup>, Baoxiang Peng <sup>1</sup>, Xiubing Huang <sup>4\*</sup>, Martin Muhler <sup>1\*</sup>

<sup>1</sup> Laboratory of Industrial Chemistry, Ruhr University Bochum, 44780 Bochum, Germany

<sup>2</sup> North China Electric Power University, 102206 Beijing, PR China

<sup>3</sup> Fachbereich Chemie, RPTU Kaiserslautern-Landau, 67663 Kaiserslautern, Germany

<sup>4</sup> Beijing Key Laboratory of Function Materials for Molecule & Structure Construction, University of Science and Technology Beijing, 100083 Beijing, PR China

#### 1. Material Preparation

##### 1.1. Materials

Unless otherwise noted, all reagents were obtained from Sigma-Aldrich or Alfa Aesar and used as received without further purification.

##### 1.2. Synthesis of the mesoporous silica template

The SiO<sub>2</sub> nanosphere was prepared according to a previously reported method based on the Stöber method. Typically, 10 mL of tetraethyl orthosilicate (TEOS) was added to 50 mL of ethanol with vigorous stirring to form solution A, meanwhile, 10 mL of aqueous ammonia and 20 mL of deionized water were added to 50 mL of ethanol with vigorous stirring to form solution B. After solution A was heated to 40 °C, solution B was added to solution A dropwise. The mixture was kept stirring at 40 °C for 2.5 h to obtain the uniform SiO<sub>2</sub> nanospheres (SiO<sub>2</sub> core). Then, a mixture solution of 10 mL TEOS, 5g polyvinylpyrrolidone (PVP) K30 (M<sub>w</sub> ~ 40000), and 10 mL ethanol was added dropwise to the above silica sol with vigorous stirring at 40 °C for 2 h to form the mesoporous SiO<sub>2</sub> shell. After cooling to room temperature, the mixed solution was centrifuged to construct the ordered structure and then dried at 80 °C overnight. The dried ordered SiO<sub>2</sub> template was calcinated at 700 °C for 6 h in the air to remove PVP and obtain the mesoporous shell (SiO<sub>2</sub> template yield: ~ 11 g).

## 2. Characterization results

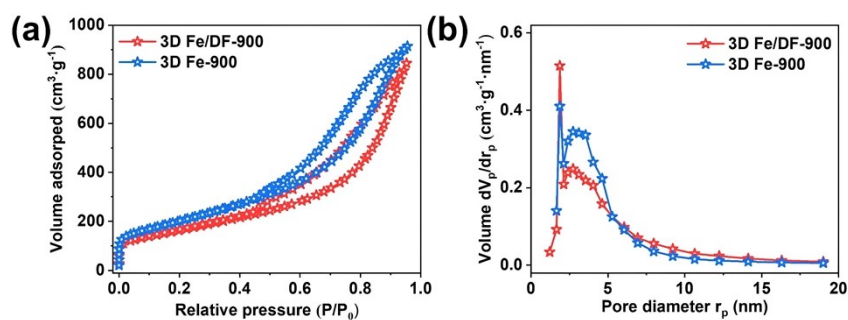

**Fig. S1** (a)  $\text{N}_2$  sorption isotherms and (b) pore size distributions of 3D Fe/DF-900 and 3D Fe-900.

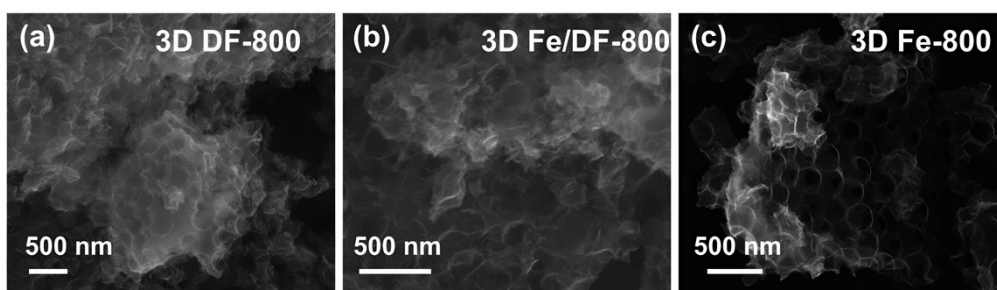

**Fig. S2** SEM images of (a) 3D DF-800, (b) 3D Fe/DF-800, and (c) 3D Fe-800.

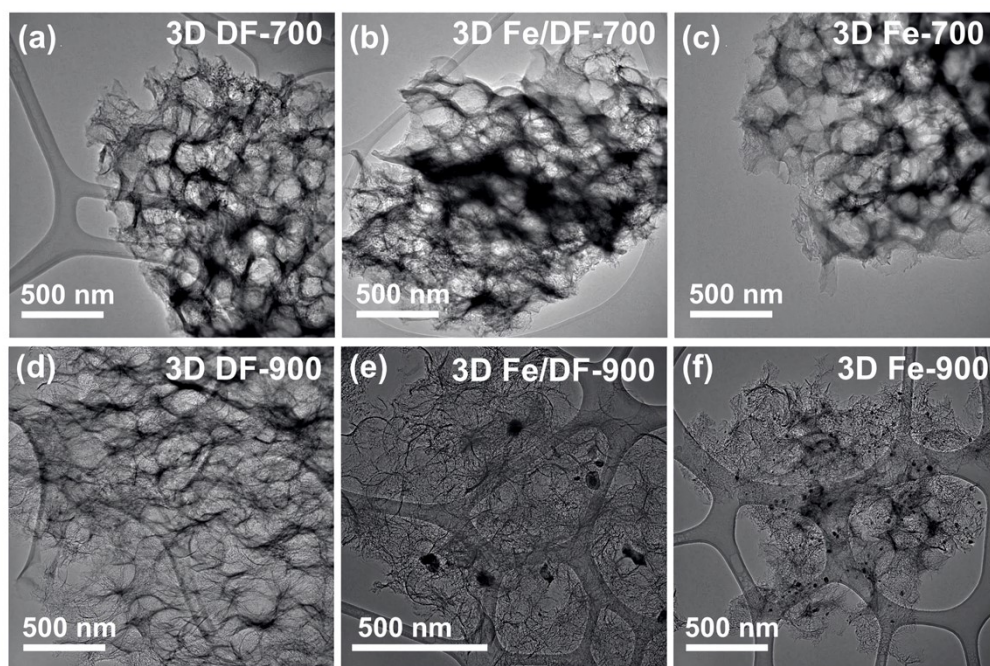

**Fig. S3** TEM images of the (a) 3D DF-700, (b) 3D Fe/DF-700, (c) 3D Fe-700, (d) 3D DF-900, (e) 3D Fe/DF-900, and (f) 3D Fe-900.

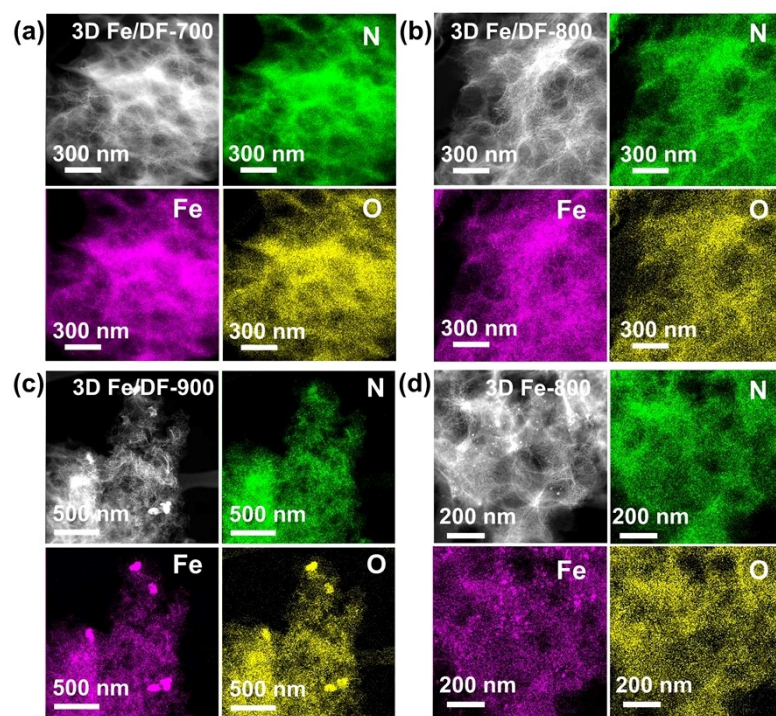

**Fig. S4** EDS elemental mapping of N, Fe and O atoms for (a) 3D Fe/DF-700, (b) 3D Fe/DF-800, (c) 3D Fe/DF-900 and (d) 3D Fe-800.

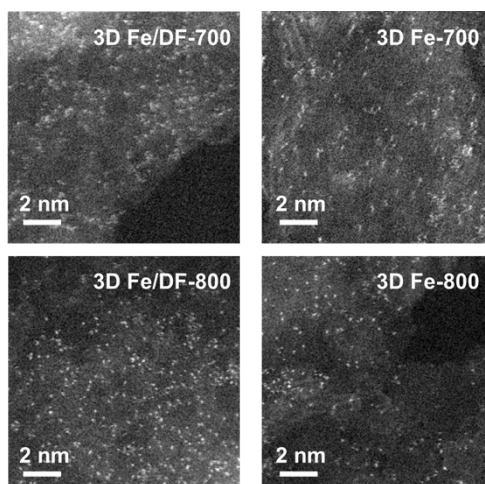

**Fig. S5** AC-HAADF-STEM images of the (a) 3D Fe/DF-700, (b) 3D Fe-700, (c) 3D Fe/DF-800, and (d) 3D Fe-800.

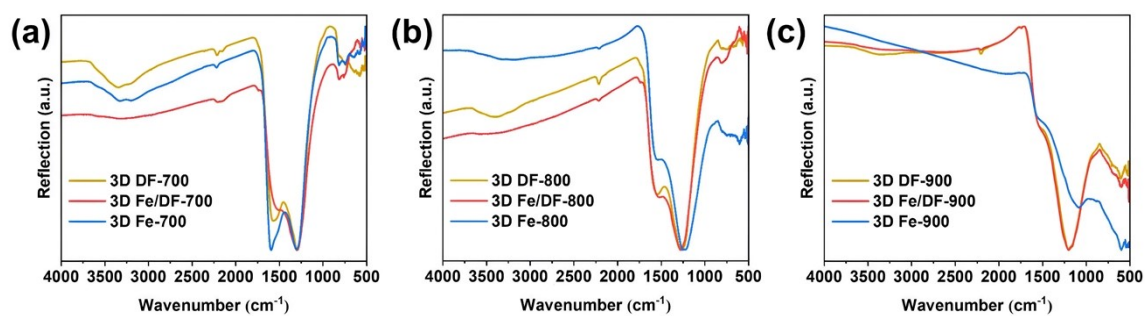

**Fig. S6** IR spectra of the 3D DF-X supports, 3D Fe/DF-X, and 3D Fe-X catalysts.

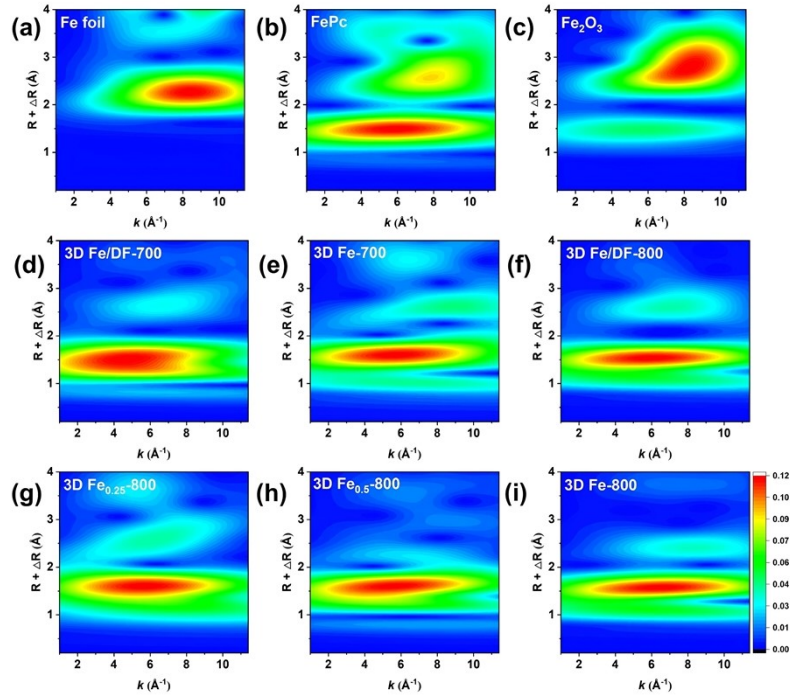

**Fig. S7** The wavelet transform contour plots of the  $k^3$ -weighted EXAFS data of (a-c) the reference samples, (d) 3D Fe/DF-700, (e) 3D Fe-700, (f) 3D Fe/DF-800, (g) 3D Fe<sub>0.25</sub>-800, (h) 3D Fe<sub>0.5</sub>-800, and (i) 3D Fe-800.

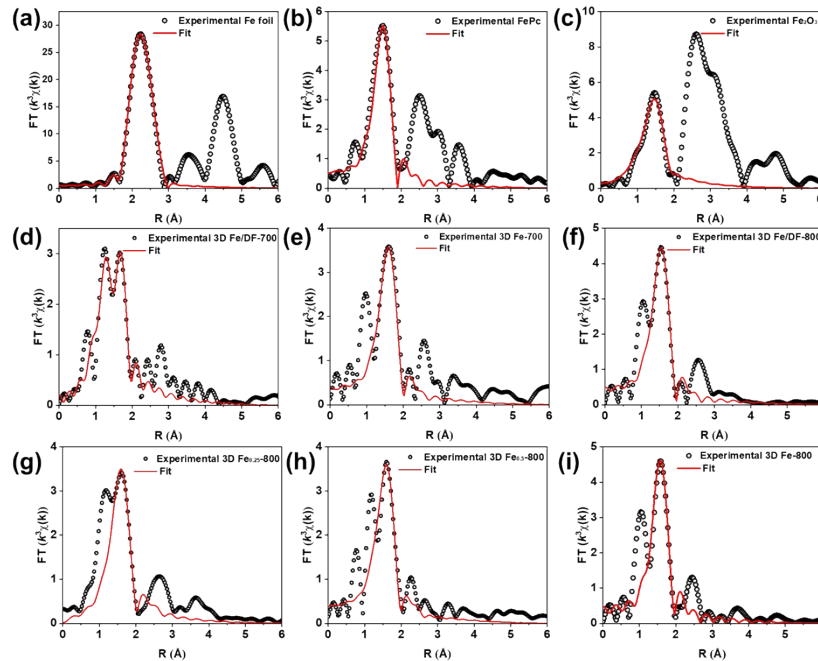

**Fig. S8** Fourier transforms of Fe K-edge EXAFS and corresponding fitting curves of (a-c) the reference samples, (d) 3D Fe/DF-700, (e) 3D Fe-700, (f) 3D Fe/DF-800, (g) 3D Fe<sub>0.25</sub>-800, (h) 3D Fe<sub>0.5</sub>-800, and (i) 3D Fe-800 in R space.

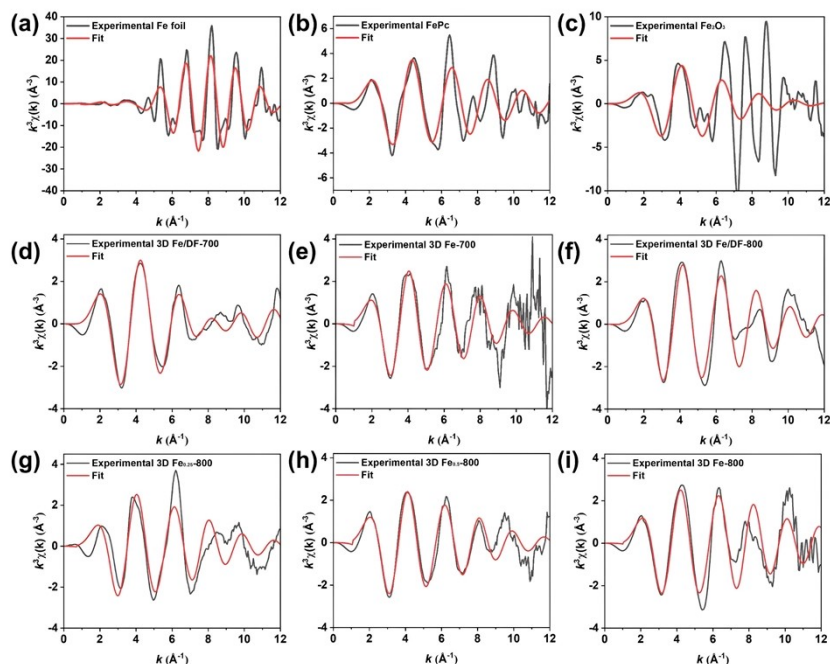

**Fig. S9** Fourier transforms of Fe K-edge EXAFS and corresponding fitting curves of (a-c) the reference samples, (d) 3D Fe/DF-700, (e) 3D Fe-700, (f) 3D Fe/DF-800, (g) 3D Fe<sub>0.25</sub>-800, (h) 3D Fe<sub>0.5</sub>-800, and (i) 3D Fe-800 in K space.

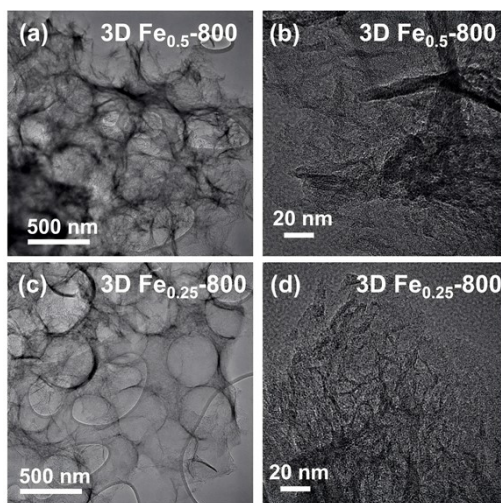

**Fig. S10** TEM images and HR-TEM images of (a-b) 3D Fe<sub>0.5</sub>-800 and (c-d) 3D Fe<sub>0.25</sub>-800.

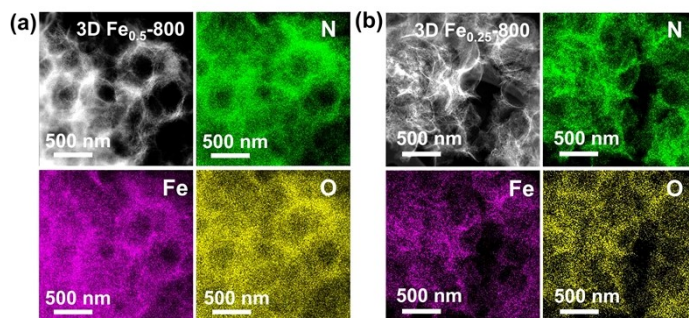

**Fig. S11** EDS elemental mapping of N, Fe, and O atoms for (a) 3D Fe<sub>0.5</sub>-800 and (b) 3D Fe<sub>0.25</sub>-800.

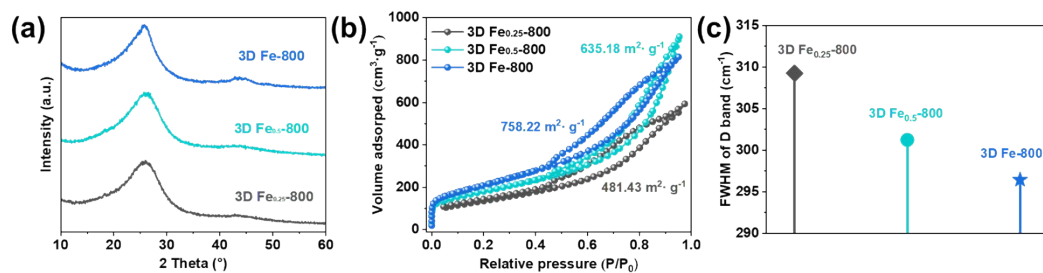

**Fig. S12** (a) XRD patterns, (b) N<sub>2</sub> sorption isotherms and (c) the full width at half maximum of the carbon D band of 3D Fe<sub>0.25</sub>-800, 3D Fe<sub>0.5</sub>-800, and 3D Fe-800.

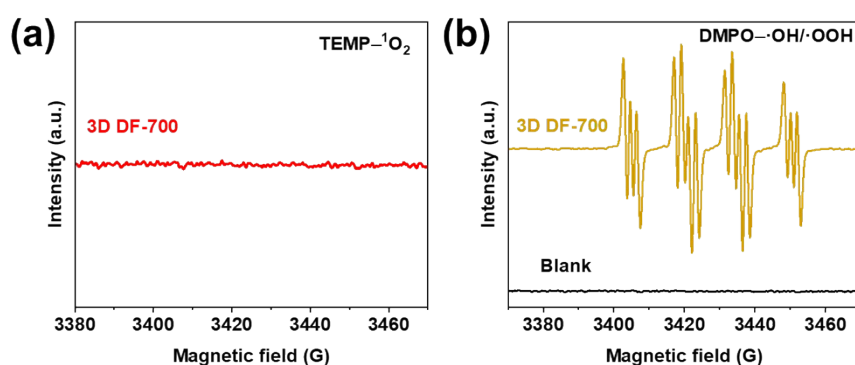

**Fig. S13** EPR signals of (a) TEMP-<sup>1</sup>O<sub>2</sub> adduct, and (b) DMPO-<sup>•</sup>OH/<sup>•</sup>OOH adducts in the presence of 3D DF-700 at 110 °C.

**Table S1** Specific surface areas and pore volumes of 3D Fe/DF-X series catalysts, 3D Fe-X series catalysts, and 3D DF-800 carbon support.

| Sample       | BET Surface area (m <sup>2</sup> /g) | BJH Pore volume (cm <sup>3</sup> /g) |
|--------------|--------------------------------------|--------------------------------------|
| 3D Fe/DF-700 | 169                                  | 0.324                                |
| 3D Fe-700    | 308                                  | 0.376                                |
| 3D Fe/DF-800 | 448                                  | 0.919                                |
| 3D Fe-800    | 758                                  | 1.258                                |
| 3D Fe/DF-900 | 590                                  | 1.312                                |
| 3D Fe-900    | 731                                  | 1.373                                |
| 3D DF-800    | 501                                  | 1.049                                |

**Table S2** Fe loadings determined by ICP-OES and EDS.

| Entry | Sample                         | Fe Content <sup>a)</sup><br>(wt.%) | Fe Content <sup>b)</sup><br>(wt.%) |
|-------|--------------------------------|------------------------------------|------------------------------------|
| 1     | 3D Fe/DF-700                   | 7.09                               | 4.92                               |
| 2     | 3D Fe-700                      | 1.48                               | 0.91                               |
| 3     | 3D Fe/DF-800                   | 6.70                               | 3.58                               |
| 4     | 3D Fe-800                      | 3.97                               | 1.48                               |
| 5     | 3D Fe/DF-900                   | 6.20                               | 2.55                               |
| 6     | 3D Fe-900                      | 3.31                               | 1.01                               |
| 7     | 3D Fe <sub>0.5</sub> -600-800  | 3.51                               | 1.68                               |
| 8     | 3D Fe <sub>0.25</sub> -600-800 | 3.28                               | 1.35                               |

<sup>a)</sup> Measured by ICP-OES; <sup>b)</sup> Measured by EDS.

**Table S3** Chemical compositions derived from XPS results.

| Entry | Sample                     | C<br>(% on surface) | N<br>(% on surface) | Fe<br>(% on surface) | O<br>(% on surface) |
|-------|----------------------------|---------------------|---------------------|----------------------|---------------------|
| 1     | 3D DF-700                  | 39.9                | 37.0                | -----                | 23.1                |
| 2     | 3D Fe/DF-700               | 32.1                | 26.7                | 28.2                 | 13.00               |
| 3     | 3D Fe-700                  | 62.6                | 34.0                | 0.6                  | 2.8                 |
| 4     | 3D DF-800                  | 49.9                | 30.6                | -----                | 19.5                |
| 5     | 3D Fe/DF-800               | 38.4                | 21.1                | 25.4                 | 15.0                |
| 6     | 3D Fe-800                  | 75.4                | 18.1                | 1.2                  | 5.3                 |
| 7     | 3D DF-900                  | 60.5                | 22.5                | -----                | 17.0                |
| 8     | 3D Fe/DF-900               | 51.6                | 16.4                | 16.3                 | 15.8                |
| 9     | 3D Fe-900                  | 85.7                | 6.9                 | 0.7                  | 6.7                 |
| 10    | 3D Fe <sub>0.5</sub> -800  | 66.5                | 27.2                | 1.0                  | 5.4                 |
| 11    | 3D Fe <sub>0.25</sub> -800 | 67.0                | 26.5                | 1.1                  | 5.5                 |

**Table S4** EXAFS fitting parameters at the Fe K-edge.

| Sample                         | First shell | N <sup>a)</sup> | R<br>(Å) <sup>b)</sup> | $\sigma^2$<br>(Å <sup>2</sup> ·10 <sup>-3</sup> ) <sup>c)</sup> | $\Delta E$<br>(eV) <sup>d)</sup> | R factor<br>(%) |
|--------------------------------|-------------|-----------------|------------------------|-----------------------------------------------------------------|----------------------------------|-----------------|
| Fe foil                        | Fe-Fe       | 8.0             | 2.48                   | 4.95                                                            | 3.3                              | 0.2             |
| Fe <sub>2</sub> O <sub>3</sub> | Fe-O        | 3.0             | 1.96                   | 7.25                                                            | 3.5                              | 0.3             |
| FePc                           | Fe-N        | 4.0             | 1.92                   | 8.01                                                            | 1.9                              | 0.2             |
| 3D Fe/DF-700                   | Fe-N        | 1.0             | 1.93                   | 5.23                                                            | 1.5                              | 0.3             |
|                                | Fe-O        | 3.1             | 1.97                   | 3.09                                                            | 5.2                              |                 |
| 3D Fe-700                      | Fe-N        | 4.0             | 1.94                   | 10.0                                                            | 3.9                              | 0.2             |
| 3D Fe/DF-800                   | Fe-N        | 3.2             | 1.93                   | 3.31                                                            | 1.2                              | 0.3             |
|                                | Fe-O        | 1.0             | 1.97                   | 6.83                                                            | 4.6                              |                 |
| 3D Fe-800                      | Fe-N        | 3.1             | 1.93                   | 5.8                                                             | 4.0                              | 0.2             |
| 3D Fe <sub>0.5</sub> -600-800  | Fe-N        | 3.8             | 1.94                   | 10.0                                                            | 4.5                              | 0.2             |
| 3D Fe <sub>0.25</sub> -600-800 | Fe-N        | 3.0             | 1.93                   | 3.52                                                            | 4.2                              | 0.1             |
|                                | Fe-O        | 1.0             | 1.97                   | 5.89                                                            | 5.9                              |                 |

<sup>a)</sup> N: coordination numbers (CN); <sup>b)</sup> R: bond distance; <sup>c)</sup>  $\sigma^2$ : Debye-Waller factors; <sup>d)</sup>  $\Delta E_0$ : the inner potential correction; R factor: goodness of fit;  $S_0^2$  was set as 0.95 for all prepared catalysts, which was obtained from the experimental EXAFS fit of the reference FePc by fixing CN as the known crystallographic value and was fixed to all the samples; Note: the error range of N and  $\sigma^2$  is within 20%, and the accuracy range for R is within  $\pm 0.04$  Å.



**Table S5** Catalytic performances of different catalysts in the oxidative coupling of benzylamine.<sup>a</sup>

| Entry | Catalyst                       | Conversion (%) | Selectivity (%) | Imine Yield (%) |
|-------|--------------------------------|----------------|-----------------|-----------------|
| 1     | No Cat.                        | 16.5           | 84.5            | 13.9            |
| 2     | 3D Fe/DF-700                   | 53.5           | 98.3            | 52.6            |
| 3     | 3D Fe-700                      | 48.5           | 95.6            | 46.4            |
| 4     | 3D Fe/DF-800                   | 86.0           | 98.5            | 84.7            |
| 5     | 3D Fe-800                      | 99.5           | 98.2            | 97.7            |
| 6     | 3D Fe/DF-900                   | 80.8           | 97.1            | 78.5            |
| 7     | 3D Fe-900                      | 90.2           | 96.3            | 86.9            |
| 8     | 3D DF-700                      | 64.0           | 96.6            | 61.9            |
| 9     | 3D DF-800                      | 48.8           | 98.2            | 47.9            |
| 10    | 3D DF-900                      | 50.0           | 97.5            | 48.8            |
| 11    | 3D Fe <sub>0.25</sub> -600-800 | 86.3           | 98.8            | 85.3            |
| 12    | 3D Fe <sub>0.5</sub> -600-800  | 92.4           | 98.3            | 90.8            |

<sup>a</sup>) Reaction conditions: Unless otherwise specified, the reaction was carried out with 2 mL of benzylamine (18.3 mmol) and a 30 mg catalyst at 110 °C for 18 h under O<sub>2</sub> conditions.

**Table S6** Fe loadings of used catalysts determined by ICP-OES.

| Entry | Sample             | Fe Content (wt.%) |
|-------|--------------------|-------------------|
| 1     | Fresh 3D Fe/DF-700 | 7.1               |
| 2     | Used 3D Fe/DF-700  | 4.7               |
| 3     | Fresh 3D Fe-700    | 1.5               |
| 4     | Used 3D Fe-700     | 1.5               |
| 5     | Fresh 3D Fe/DF-800 | 6.7               |
| 6     | Used 3D Fe/DF-800  | 5.2               |
| 7     | Fresh 3D Fe-800    | 4.0               |
| 8     | Used 3D Fe-800     | 4.0               |

**Table S7** Oxidative coupling of various amines to imines over 3D Fe/DF-800 and 3D Fe-800<sup>a</sup>.

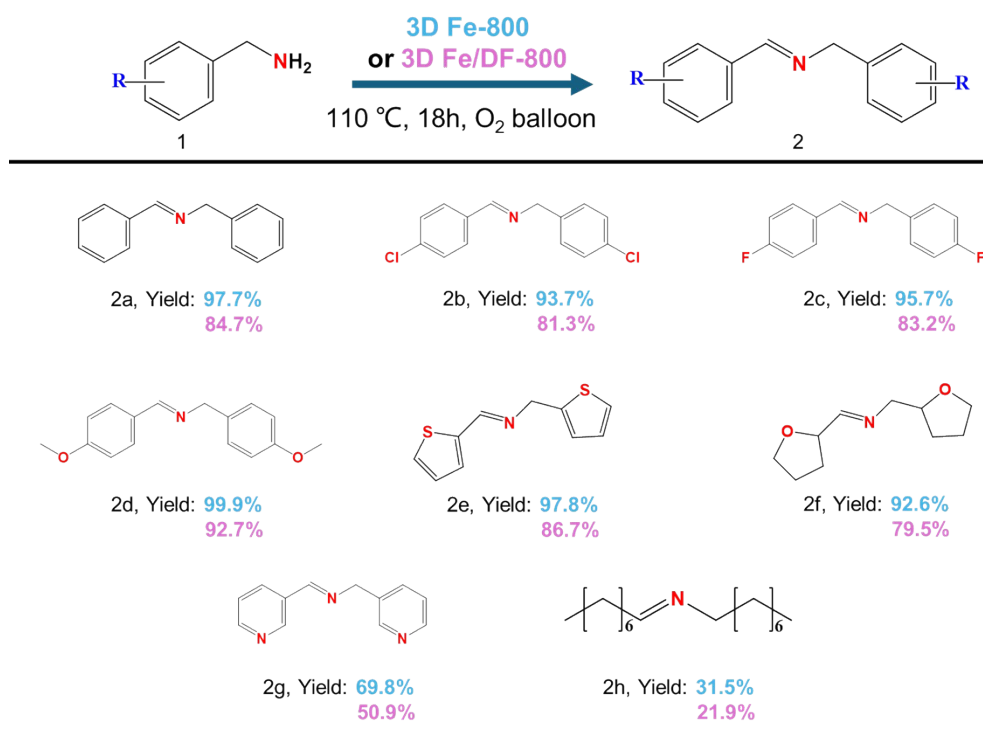

<sup>a</sup> Reaction conditions: amines (18.3 mmol), catalyst (30 mg), O<sub>2</sub> balloon, 110 °C and 18 h.
